# Supplementary material for: Splicing is an alternate oncogenic pathway activation mechanism in glioma
Source: PubMed Central journal article supplement (PMC8803922; doi:10.1038/s41467-022-28253-4), 2022-01-31
Supplement: 41467_2022_28253_MOESM1_ESM.pdf [file 41467_2022_28253_MOESM1_ESM.pdf]

## **Supplementary Information**

Siddaway et al., Splicing is an alternate oncogenic pathway activation mechanism in glioma

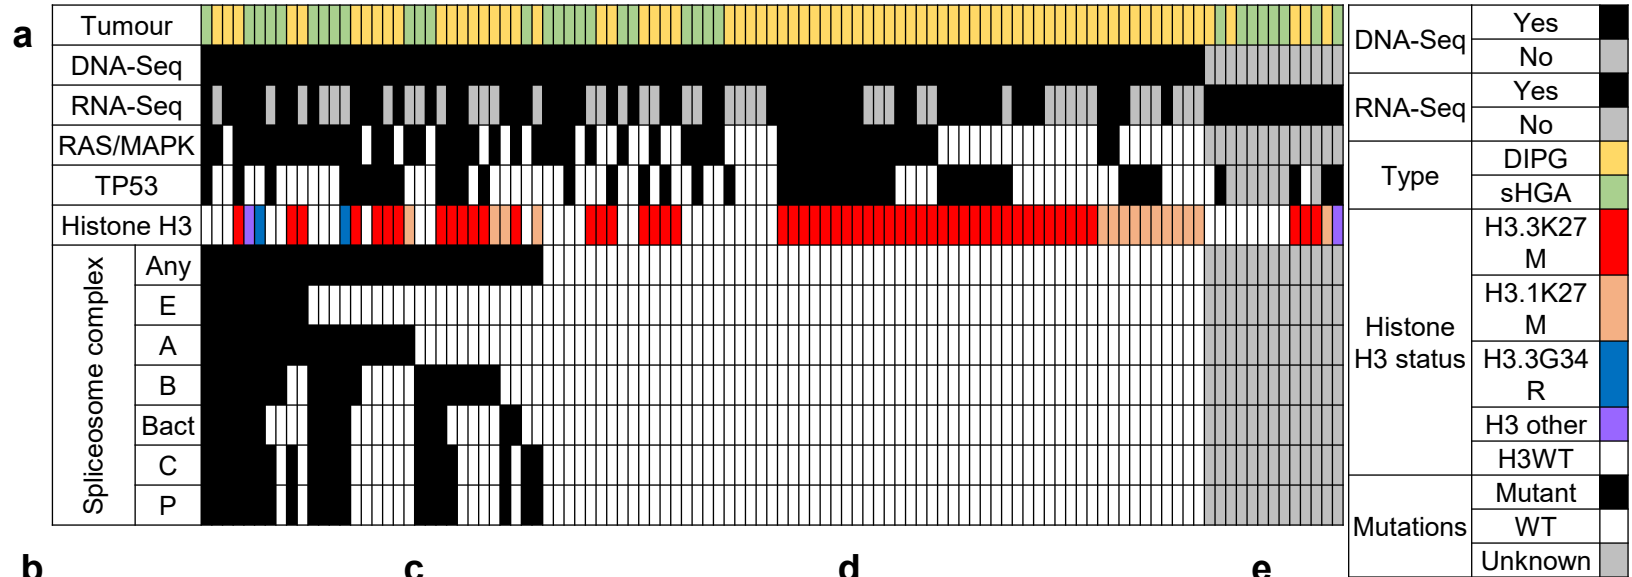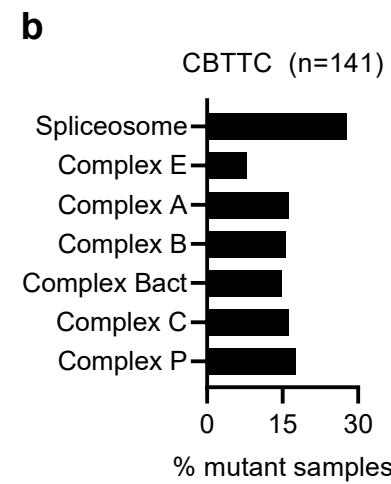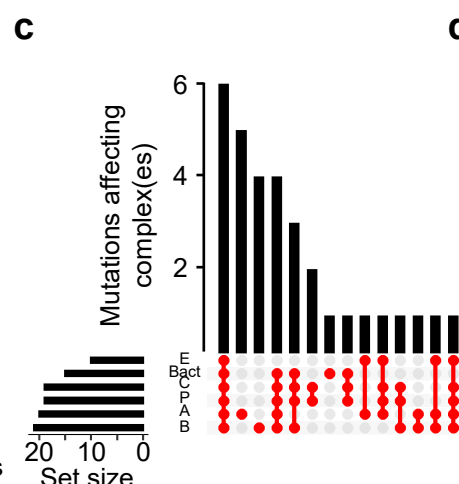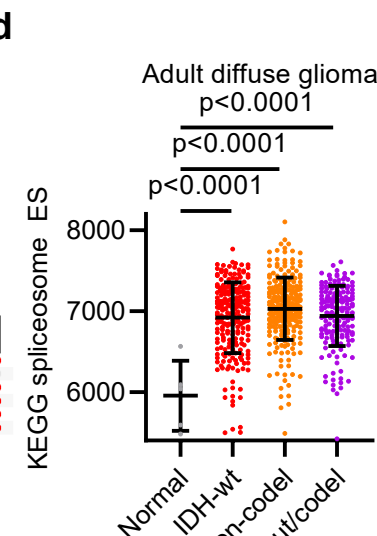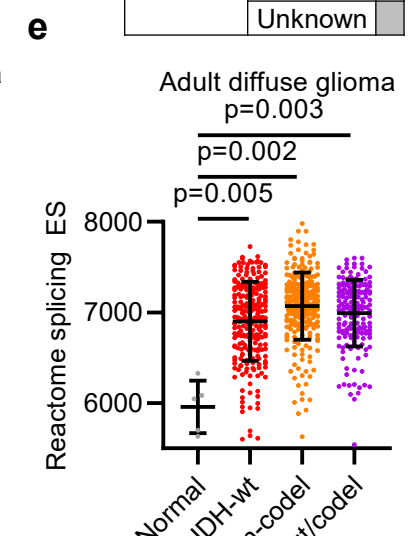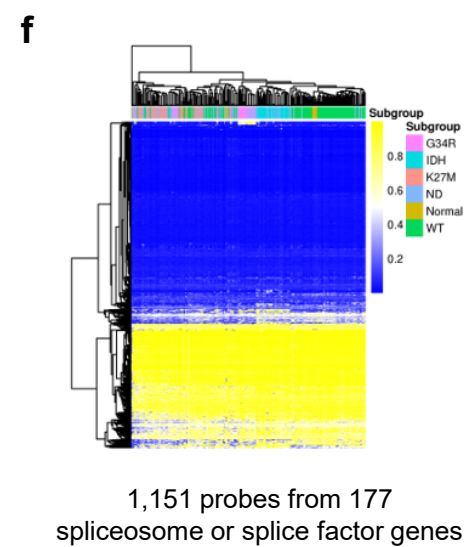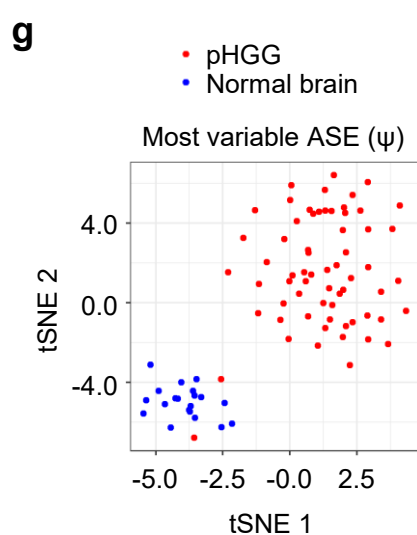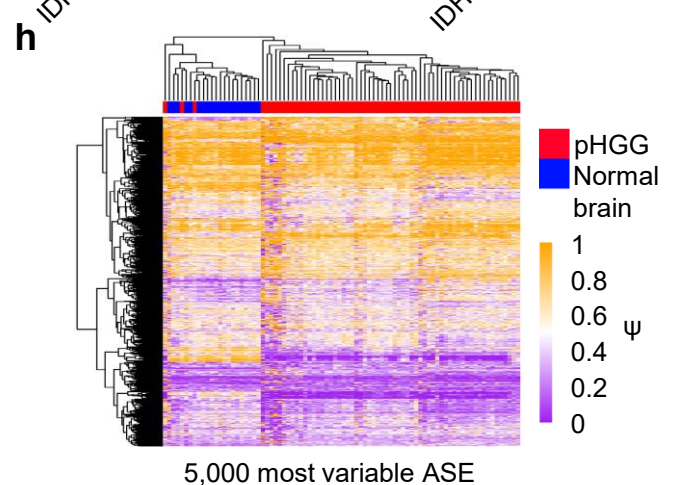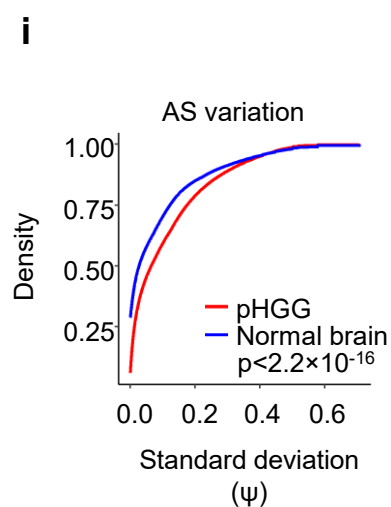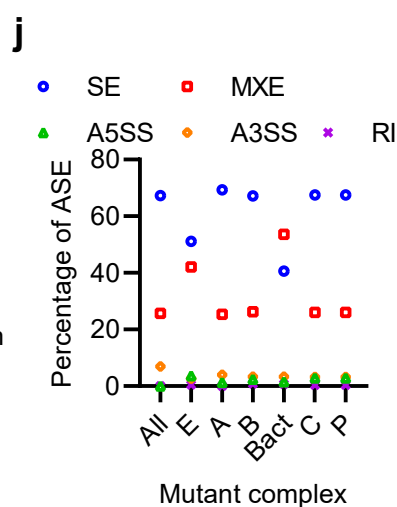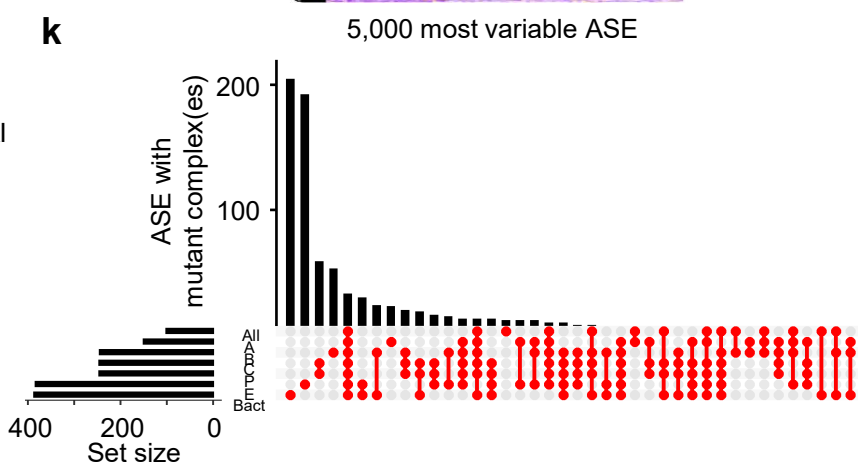

### Supplementary Figure 1. Spliceosome mutations and alternative splicing in pHGG

- A. Oncoprint of samples used in the study showing clinical characteristics as well as common and spliceosome complex mutation status.
- B. Frequency of spliceosome mutations in pHGG in total (Spliceosome) and by subcomplex for CBTTTC dataset (n=141).
- C. UpSet plot showing the distribution of mutations in pHGG across different spliceosome complexes. The top graph shows the number of mutations in genes shared by the combination of complexes at the bottom (red dots connected by lines). The graph at bottom left shows the number of pHGG with mutations affecting a given complex.
- D. Single sample gene set enrichment analysis (ssGSEA) of spliceosome component expression in normal brain (n=5) and IDH-wt (n=243), IDH-mut/non-codel (n=270) and IDH-mut/codel (n=173) adult diffuse glioma. Bars show mean  $\pm$  standard deviation. ES: enrichment score.
- E. Splicing pathway single sample gene set enrichment analysis (ssGSEA) of mRNA splicing pathway genes in normal brain (n=5) and IDH-wt (n=243), IDH-mut/non-codel (n=270) and IDH-mut/codel (n=173) adult diffuse glioma. Bars show mean  $\pm$  standard deviation. ES: enrichment score.
- F. Heatmap showing DNA methylation beta-value of probes associated with spliceosome components and spliceosome genes in pHGG (n=230) and normal brain (n=7)<sup>23,77</sup>.
- G. t-SNE of the 5,000 most variable alternately spliced events (ASE) across pHGG and normal brain.
- H. Heatmap of 5,000 most variable ASE between pHGG and normal brain.
- I. Cumulative distribution function plots comparing the standard deviation of each ASE in normal brain and pHGG.
- J. Percentage of differential ASE ( $|\Delta\psi|>0.15$ , FDR<0.05) identified between pHGG with mutations in the indicated spliceosome complex and pHGG with WT spliceosomes that come from each ASE category. See also Supplementary Figure 2a for schematic of event types.
- K. UpSet plot showing overlaps in the unique ASE identified in spliceosome-mutant pHGG. The top graph shows the number of ASE that were differentially spliced in pHGG with the combination of mutant spliceosome complexes shown at the bottom (red dots). The graph at bottom left shows the number of differential ASE associated with each complex.

Statistical tests: Brown-Forsythe ANOVA with Dunnett's T3 multiple comparisons test (D, E), 2-sided Kolmogorov-Smirnov (H). Source data are provided as a Source Data file.

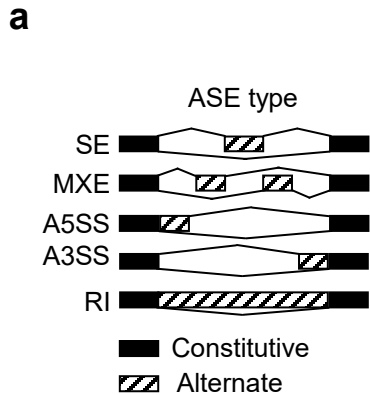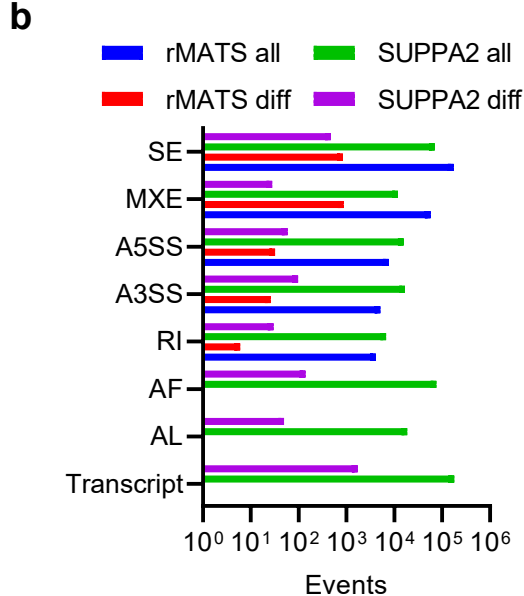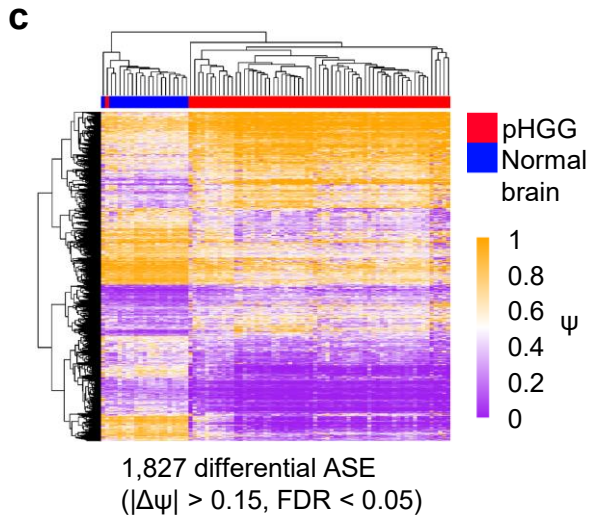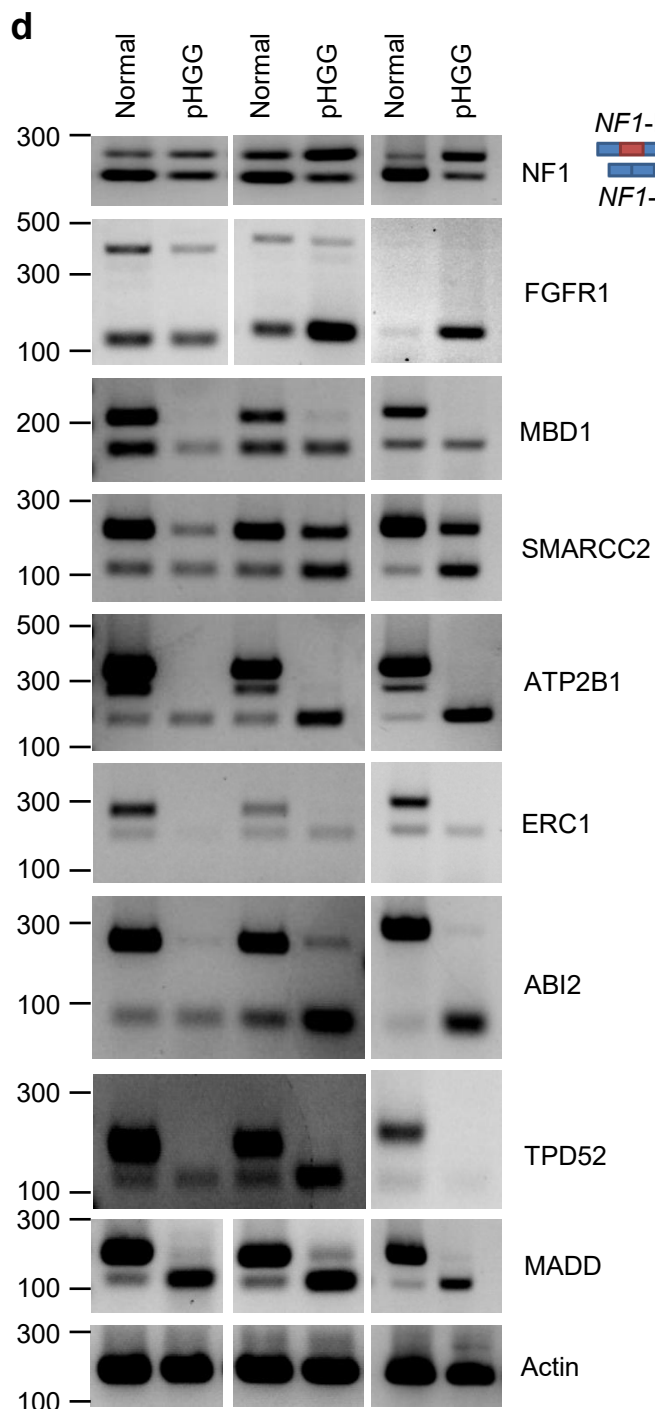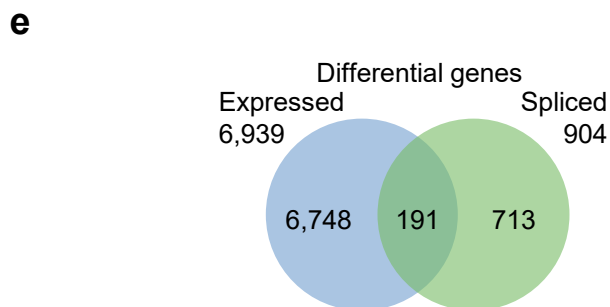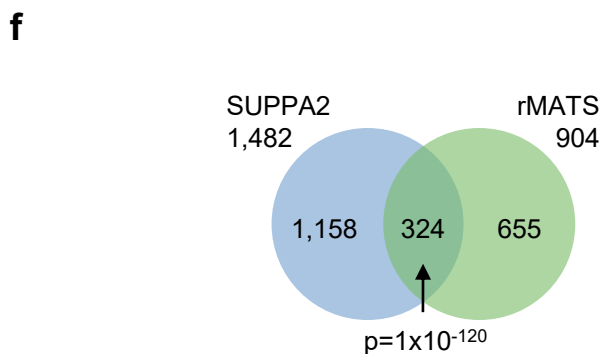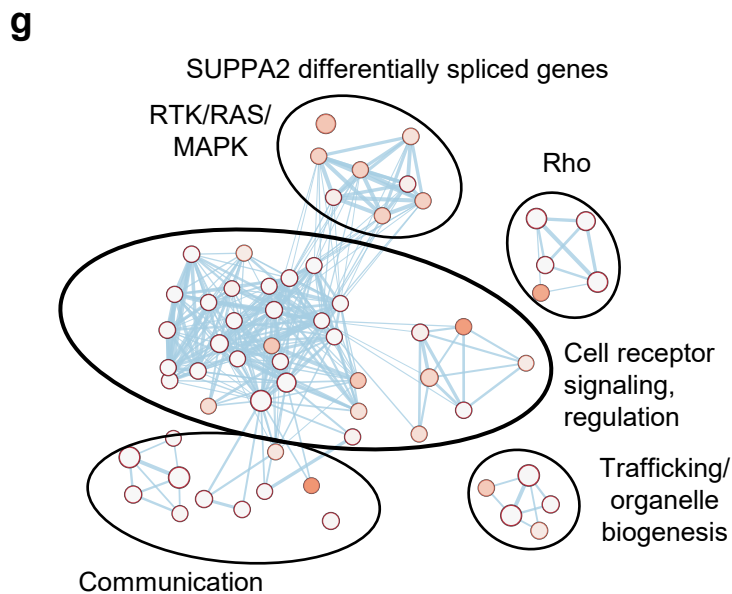

**Supplementary Figure 2. AS landscape of pHGG**

- A. Cartoon of alternative splice events (ASE) characterised. SE: skipped exon. MXE: mutually exclusive exon. A5SS: alternative 5' splice site. A3SS: alternative 3' splice site. RI: retained intron.
- B. Number of total and differential splicing events by rMATS and SUPPA2. SUPPA2 additionally characterises splicing events based on alternate first (AF) and last (AL) exons, as well as through switches in isoform abundances.
- C. Heatmap of differential alternately spliced events (ASE;  $|\Delta\psi|>0.15$ , FDR<0.05) identified between pHGG (n=64) and normal brain (n=20).
- D. RT-PCR of indicated differential splicing events in 3 matched pairs of pHGG and normal brain.
- E. Venn diagram comparing differentially expressed ( $|\log_2FC|>1$ , adjusted p<0.05) and differentially spliced genes in pHGG.
- F. Venn diagram comparing genes identified with differential ASE in pHGG by rMATS and SUPPA2.
- G. Cytoscape network of significant Reactome pathways (FDR<0.05) enriched in differential ASE identified by SUPPA2.

Statistical tests: hypergeometric (F). Source data are provided as a Source Data file.

**a**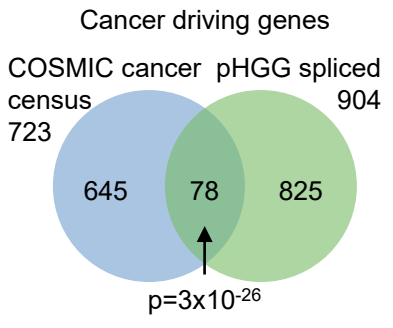**b**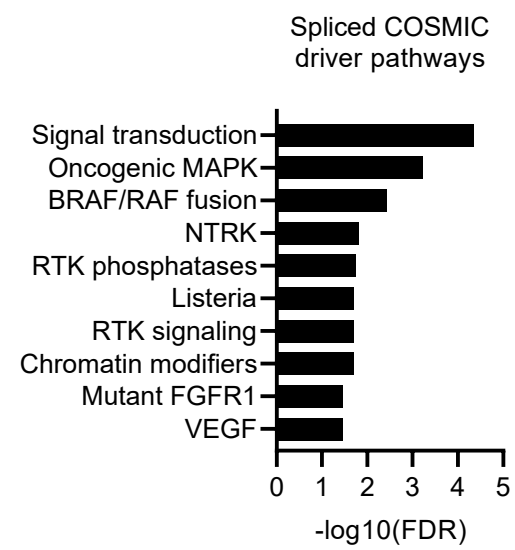**c**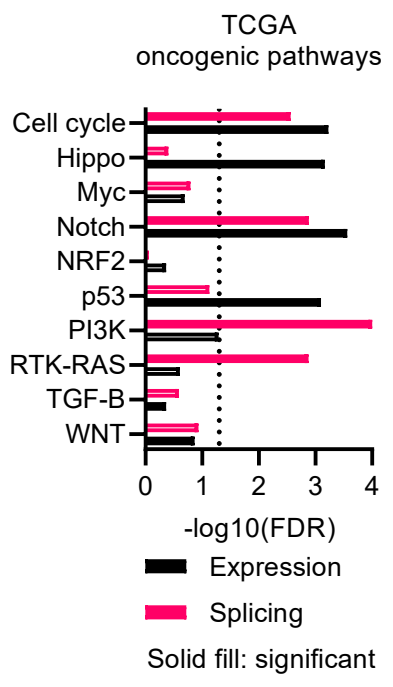**d**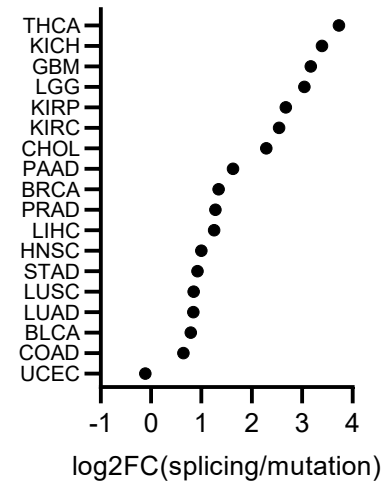**e**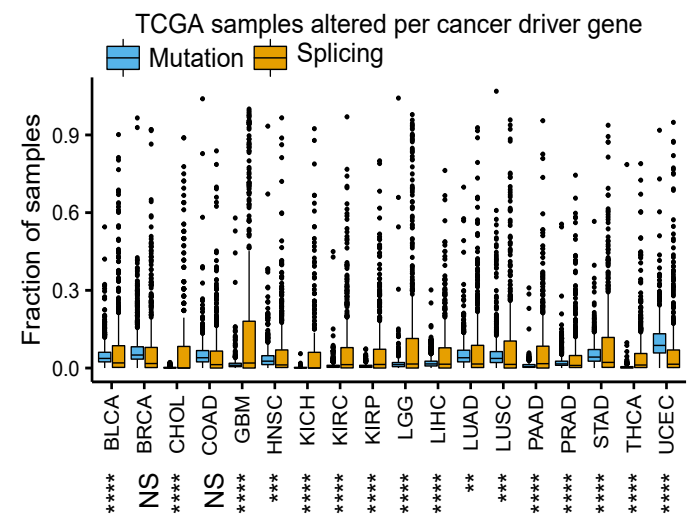

**Supplementary Figure 3. pHGG and adult pan-cancer alternative splicing**

- A. Venn diagram comparing differentially spliced genes in pHGG with the COSMIC cancer driver gene census.
- B. Reactome pathways enriched among differentially spliced COSMIC driver genes.
- C. Gene set enrichment analysis (GSEA) was conducted on splicing and expression changes in TCGA oncogenic pathways by comparing pHGG (n=64) and normal brain (n=20). Solid-filled bars are significant with  $FDR < 0.05$ . The dotted line marks the  $-\log_{10}(0.05)$  significance cutoff.
- D. Plot of  $\log_2$ -fold change ( $\log_2FC$ ) in mean splicing versus mutation burden across TCGA subtypes.
- E. Pan-cancer burden of splicing and mutations in COSMIC cancer driver genes, showing the fraction of samples with an alteration per driver gene. The box marks the interquartile range (IQR) and shows the median value. The whiskers extend to 1.5x IQR and outliers outside this are plotted separately. See Supplementary Data 6 for n and p-values.

Statistical tests: hypergeometric (A), t-test with Benjamini-Hochberg multiple hypothesis testing correction (E). \*\*:  $p < 0.01$ , \*\*\*:  $p < 0.001$ , \*\*\*\*:  $p < 0.0001$ . NS: not significant. Source data are provided as a Source Data file.

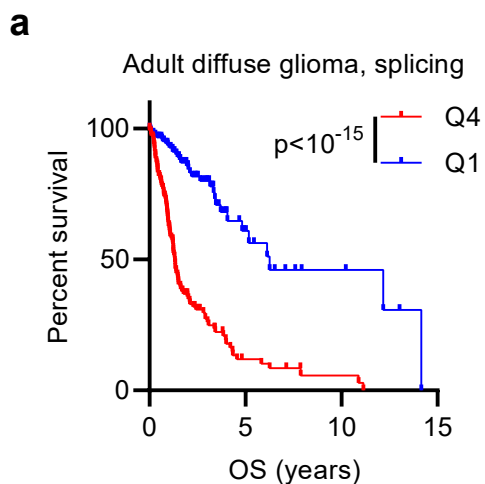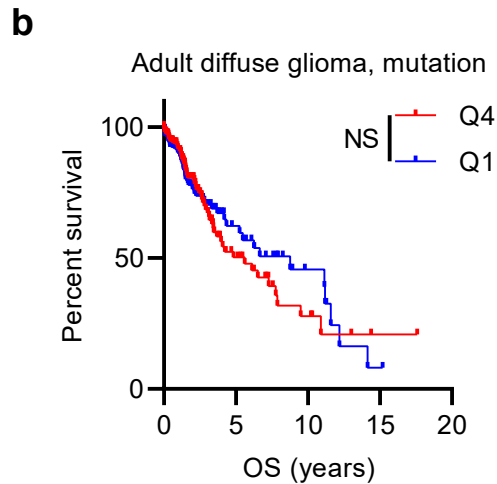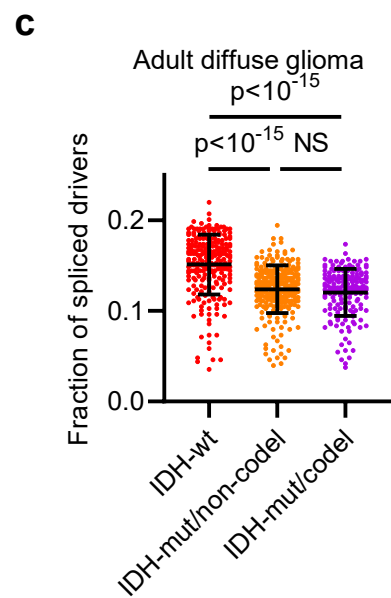

**d**

| Adult diffuse glioma              | Univariate |            |                        | Multivariate |            |                      |
|-----------------------------------|------------|------------|------------------------|--------------|------------|----------------------|
|                                   | HR         | 95% CI     | p-value                | HR           | 95% CI     | p-value              |
| Splicing Q4 v Q1                  | 4.93       | 3.32-7.32  | $2.86 \times 10^{-15}$ | 2.29         | 1.22-4.31  | 0.01                 |
| Mutation Q4 v Q1                  | 1.11       | 0.77-1.61  | 0.58                   | 1.01         | 0.57-1.80  | 0.98                 |
| IDH-mut/codel v IDH-mut/non-codel | 1.55       | 0.95-2.53  | 0.082                  | 1.80         | 0.57-5.64  | 0.31                 |
| v IDH-wt                          | 13.28      | 8.43-20.92 | $< 2 \times 10^{-16}$  | 10.08        | 3.40-29.88 | $3.1 \times 10^{-5}$ |

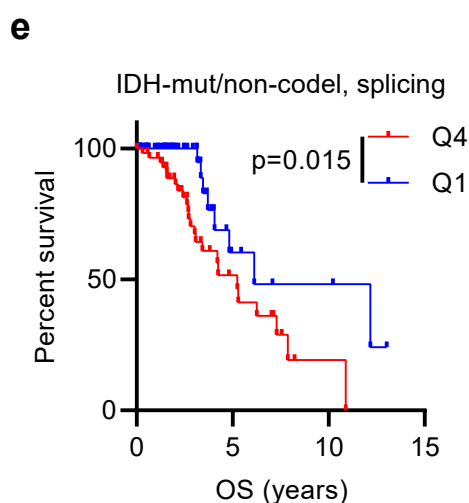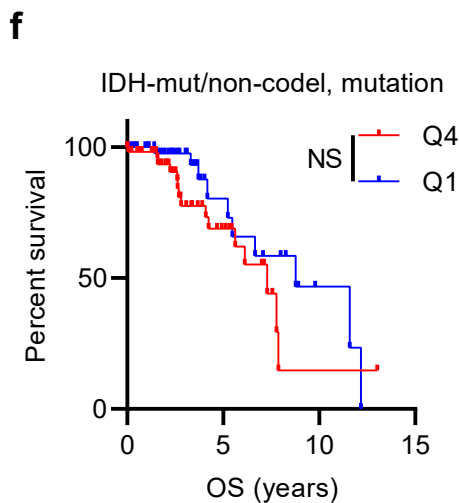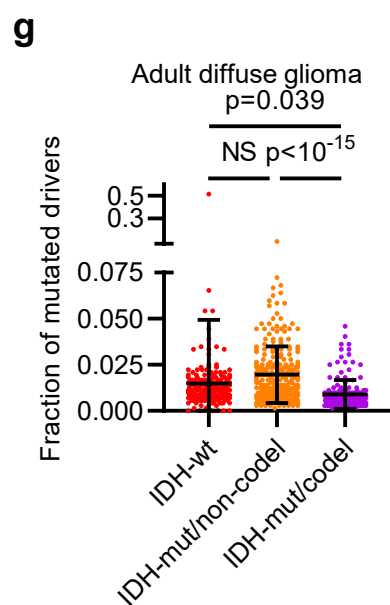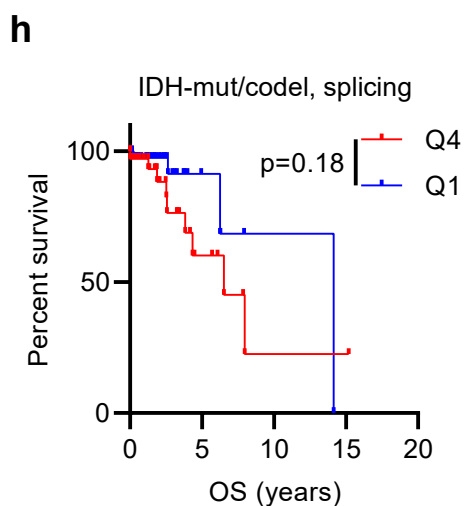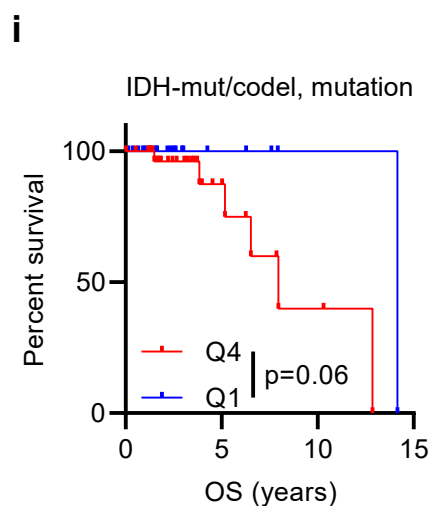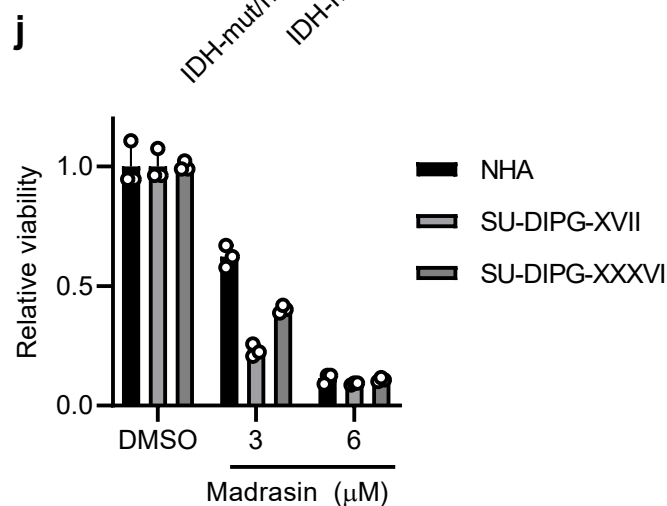



**Supplementary Figure 4. Increased cancer driver splicing burden is associated with poor outcome in adult diffuse glioma.**

- A. Kaplan-Meier survival plot of adult diffuse glioma patients that are in the top (Q4, n=156) or bottom (Q1, n=160) quartile of splicing burden of cancer driver genes.
- B. Kaplan-Meier survival plot of adult diffuse glioma patients that are in the top (Q4, n=158) or bottom (Q1, n=227) quartile of mutation burden of cancer driver genes.
- C. Burden of cancer driver splicing alterations per sample in IDH-wt (n=231), IDH-mut/non-codel (n=257) and IDH-mut/codel (n=169) adult diffuse glioma. Bars show mean  $\pm$  standard deviation.
- D. Univariate and multivariate Cox proportional-hazards survival analysis of adult diffuse glioma accounting for cancer driver gene splicing and mutation burden (Q4 vs Q1), and subgroup. HR: hazard ratio. CI: confidence interval.
- E. Kaplan-Meier survival plot of IDH-mut/non-codel patients that are in the top (Q4, n=60) or bottom (Q1, n=57) quartile of splicing burden of cancer driver genes.
- F. Kaplan-Meier survival plot of IDH-mut/non-codel patients that are in the top (Q4, n=59) or bottom (Q1, n=59) quartile of mutation burden of cancer driver genes.
- G. Burden of cancer driver mutations per sample in IDH-wt (n=225), IDH-mut/non-codel (n=253) and IDH-mut/codel (n=167) adult diffuse glioma. Bars show mean  $\pm$  standard deviation.
- H. Kaplan-Meier survival plot of IDH-mut/codel patients that are in the top (Q4, n=36) or bottom (Q1, n=42) quartile of splicing burden of cancer driver genes.
- I. Kaplan-Meier survival plot of IDH-mut/codel patients that are in the top (Q4, n=33) or bottom (Q1, n=22) quartile of mutation burden of cancer driver genes.
- J. Cell lines were treated with DMSO or madrasin for 4 days and viable cells counted (n=3). Bars show mean  $\pm$  standard deviation.

Statistical tests: log-rank (A, B, E, F, H, I), ANOVA with Games-Howell's multiple comparisons test (C, G), Cox PH (D). Source data are provided as a Source Data file.

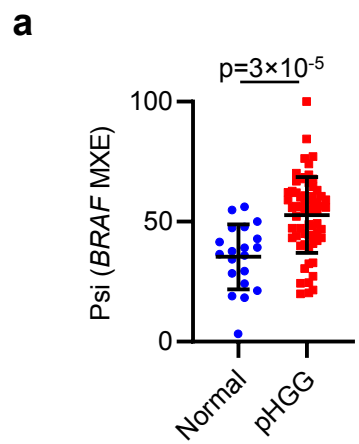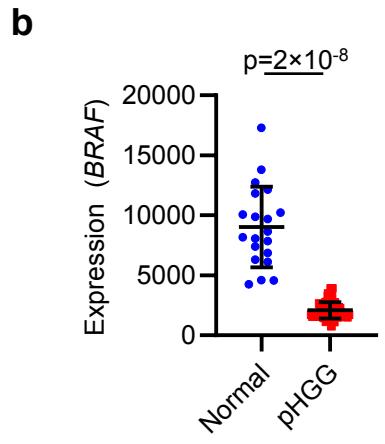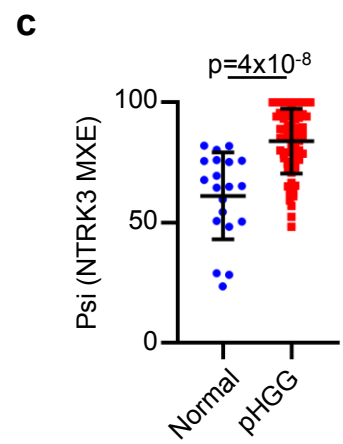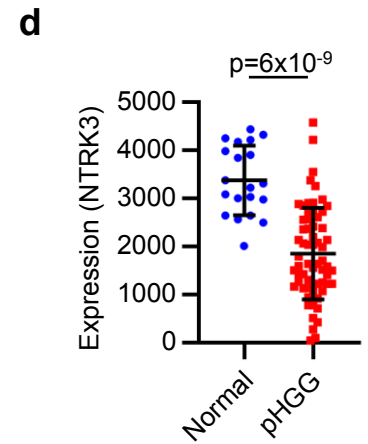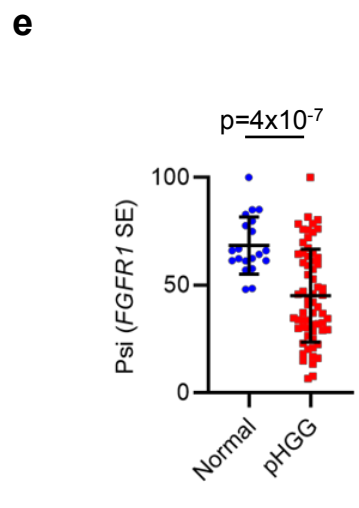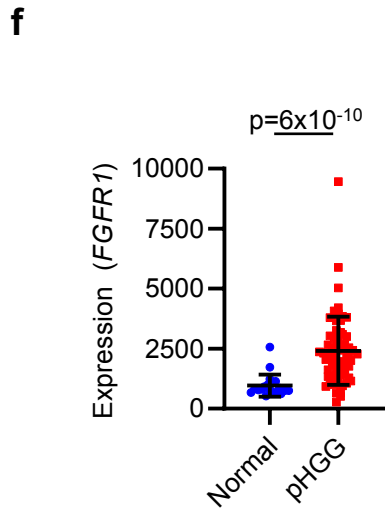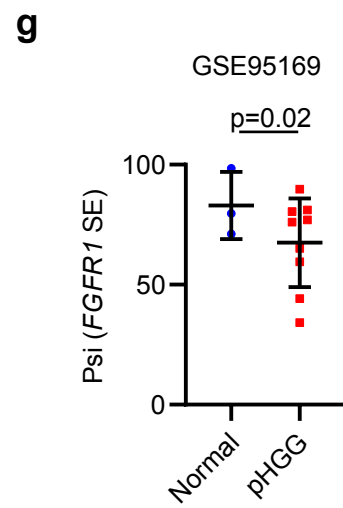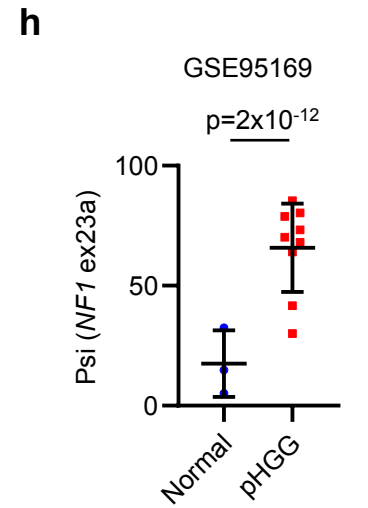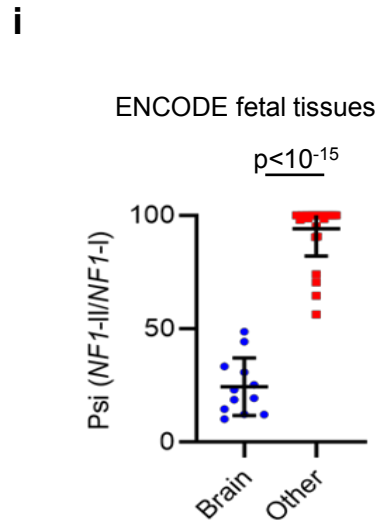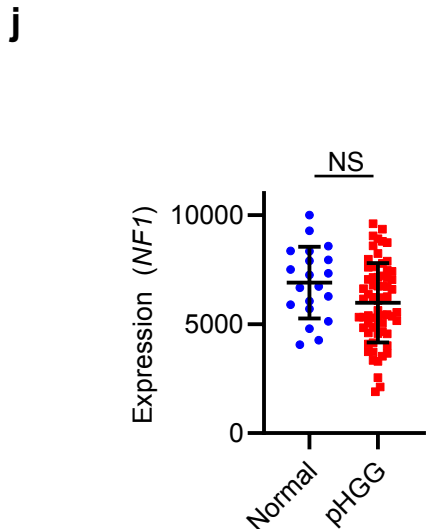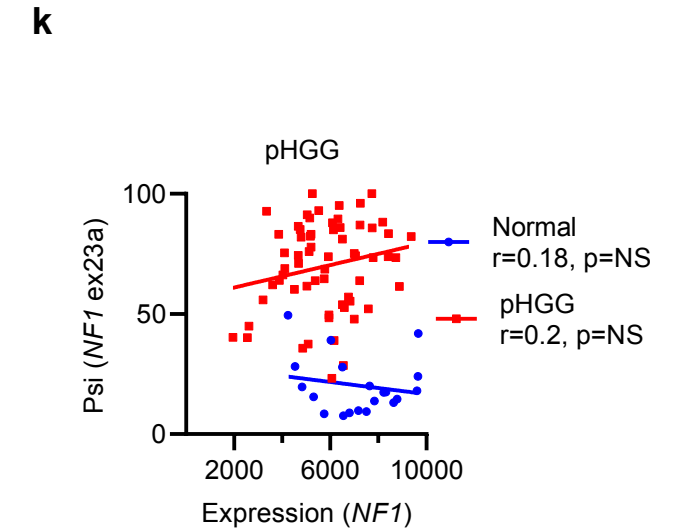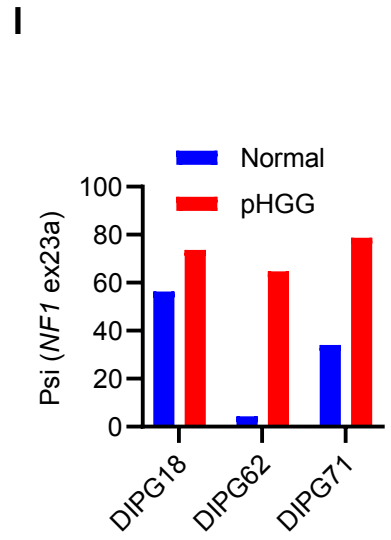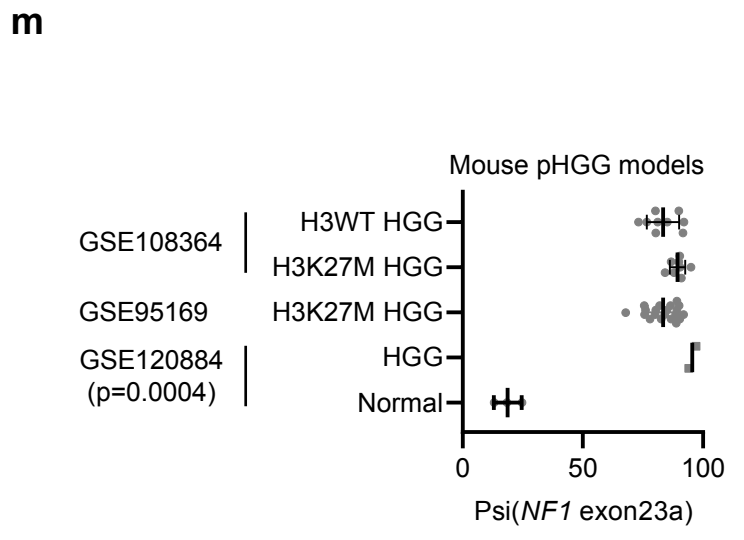

**Supplementary Figure 5. AS of RAS/MAPK pathway genes in pHGG**

- A. Percent inclusion (Psi) of differential *BRAF* MXE (mutually exclusive exon) in pHGG (n=54) and normal brain (n=20). Bars show mean  $\pm$  standard deviation.
  - B. Expression of *BRAF* in pHGG (n=64) and normal brain (n=20). Bars show mean  $\pm$  standard deviation.
  - C. Psi of differential *NTRK3* MXE in pHGG (n=64) and normal brain (n=20). Bars show mean  $\pm$  standard deviation.
  - D. Expression of *NTRK3* in pHGG (n=64) and normal brain (n=20). Bars show mean  $\pm$  standard deviation.
  - E. Percent inclusion of differential *FGFR1* SE (skipped exon) in pHGG (n=64) and normal brain (n=20). Bars show mean  $\pm$  standard deviation.
  - F. Expression of *FGFR1* in pHGG (n=64) and normal brain (n=20). Bars show mean  $\pm$  standard deviation.
  - G. Psi of differential *FGFR1* SE in pHGG (n=9) and normal brain (n=3) from GSE95169<sup>25</sup>. Bars show mean  $\pm$  standard deviation.
  - H. Psi of *NF1* exon23a in pHGG (n=9) and normal brain (n=3) from GSE95169<sup>25</sup>. Bars show mean  $\pm$  standard deviation.
  - I. Percent inclusion (psi) of *NF1* exon23a in ENCODE RNA-Seq fetal tissue datasets from ENCODE. Samples were separated into brain (cerebellum, diencephalon, frontal cortex, occipital lobe, parietal lobe, temporal lobe; n=12) and non-brain (bladder, eye, heart, heart, kidney, liver, lung, skeletal muscle, skin, stomach, thyroid, tongue, umbilical cord, uterus; n=28). Bars show mean  $\pm$  standard deviation.
  - J. *NF1* gene expression in pHGG (n=64) and normal brain (n=20). Bars show mean  $\pm$  standard deviation.
  - K. Scatter plot of *NF1* expression and *NF1* exon23a inclusion in pHGG and normal brain. r: Pearson correlation.
  - L. qRT-PCR analysis of *NF1* exon23a inclusion in 3 matched pairs of pHGG and normal brain. Results are presented as the mean of 3 technical replicates.
  - M. *NF1* exon23a inclusion in mouse pHGG models. GSE120884<sup>30</sup> (H3K27M (n=2) and normal brain (n=3); H3K27M, GSE95169<sup>23</sup>; H3K27M and H3WT, GSE108364<sup>31</sup>).
- Statistical tests: t-test (all). Source data are provided as a Source Data file.

**a**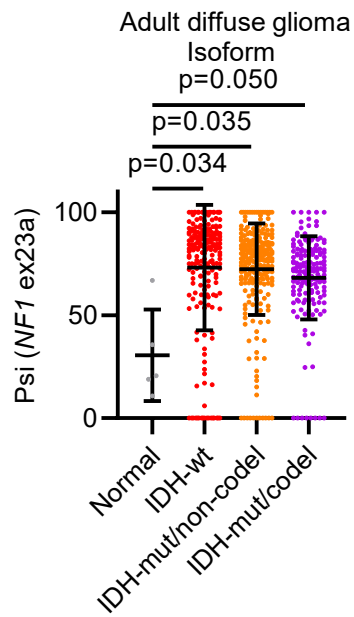**b**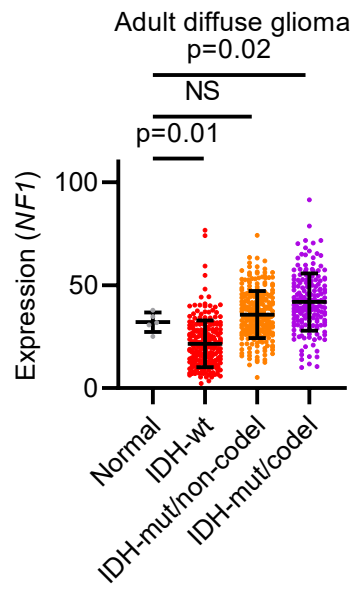**c**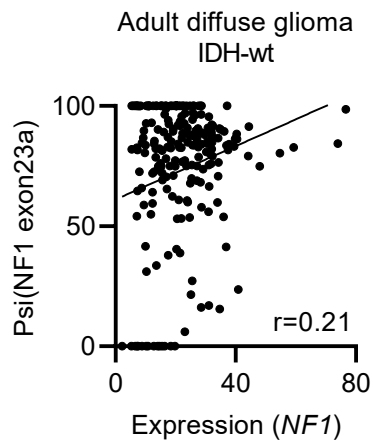**d**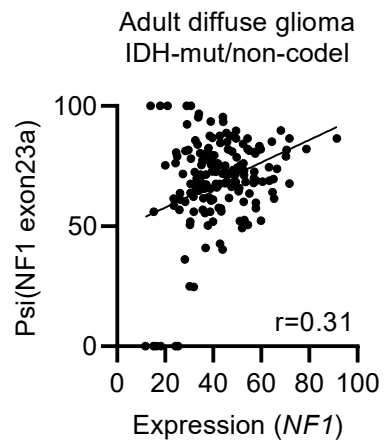**e**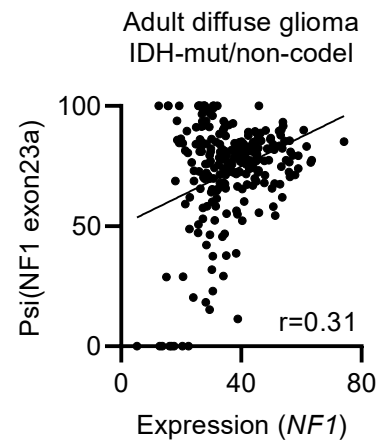

**Supplementary Figure 6. Alternative splicing of *NF1* in adult HGG**

- A. *NF1* exon23a percent inclusion (psi) based on *NF1* transcript ratios in TCGA diffuse glioma dataset: adult normal brain (n=5) and IDH-wt (n=231), IDH-mut/non-codel (n=256) and IDH-mut/codel (n=170) HGG. Bars show mean  $\pm$  standard deviation.
- B. *NF1* expression in normal brain (n=5) and IDH-wt (n=233), IDH-mut/non-codel (n=258) and IDH-mut/codel (n=172) adult diffuse glioma subgroups. Bars show mean  $\pm$  standard deviation.
- C. Scatter plot of *NF1* expression and percent inclusion (psi) of *NF1* exon23a in IDT-wt adult diffuse glioma. r: Pearson correlation.
- D. Scatter plot of *NF1* expression and percent inclusion (psi) of *NF1* exon23a in IDT-mut/non-codel adult diffuse glioma. r: Pearson correlation.
- E. Scatter plot of *NF1* expression and percent inclusion (psi) of *NF1* exon23a in IDT-mut/codel adult diffuse glioma. r: Pearson correlation.

Statistical tests: Brown-Forsythe ANOVA with Dunnett's T3 multiple comparisons test (A, B).

Source data are provided as a Source Data file.

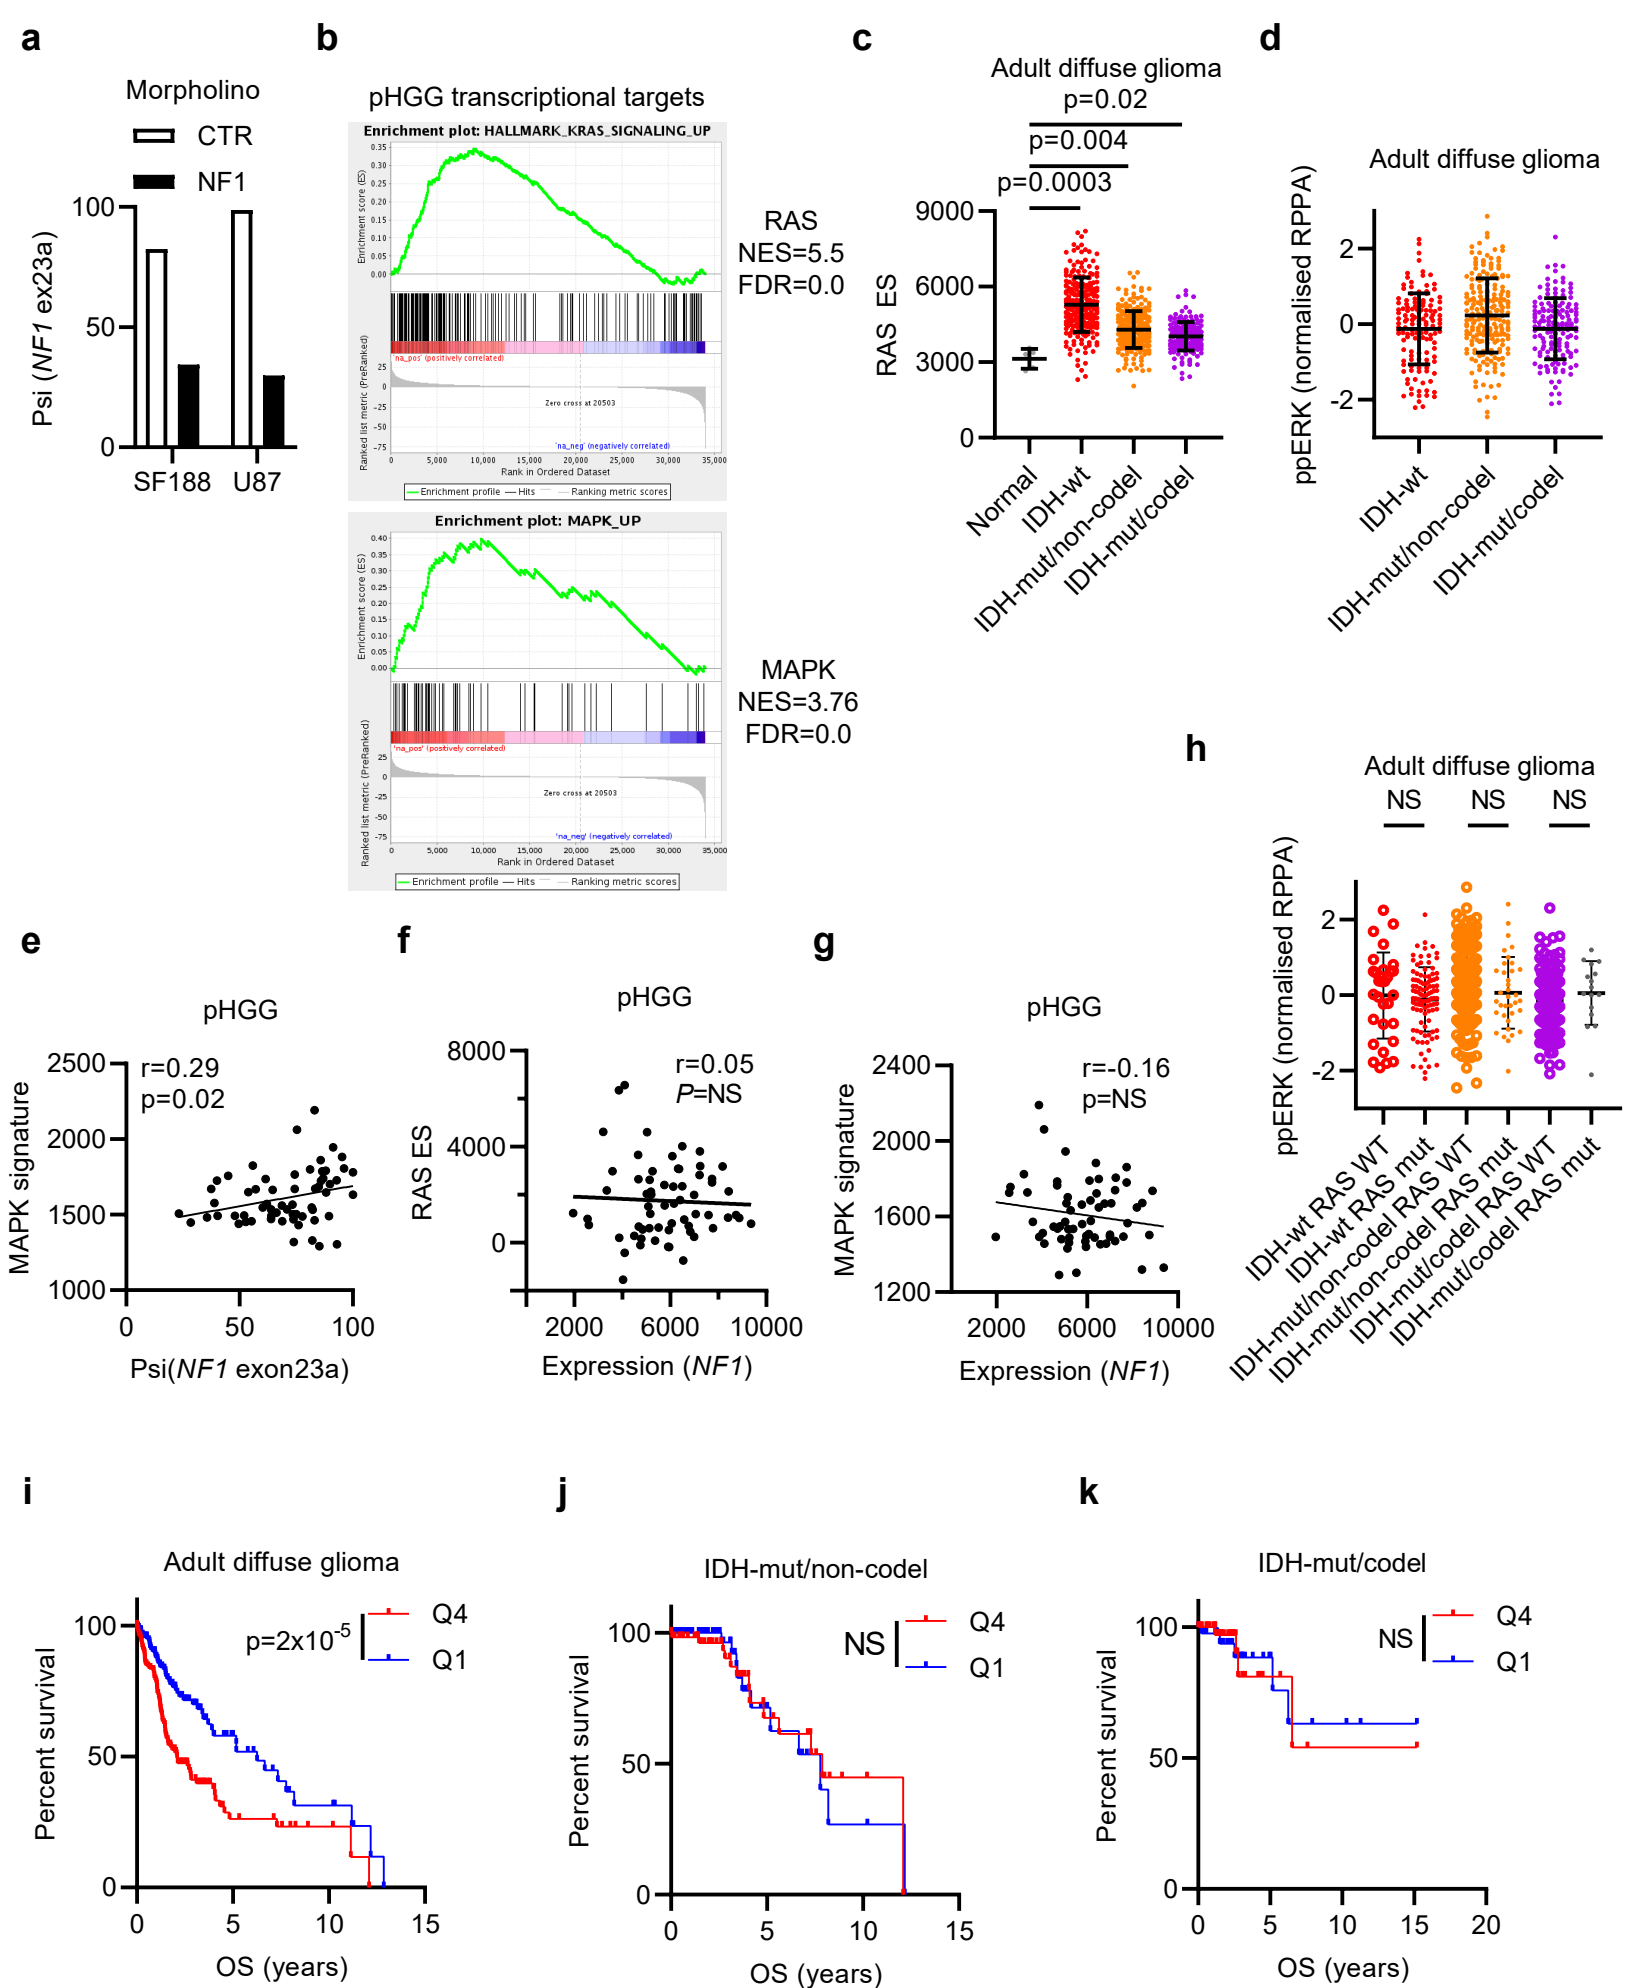

**Supplementary Figure 7. Regulation of RAS/MAPK by *NF1* exon23a in HGG**

- A. qRT-PCR analysis of *NF1* exon23a inclusion in cells harvested 40 hours post-transfection with control or morpholinos targeting the up and downstream intron/exon junctions of *NF1* exon23a. Results are representative of two experiments.
- B. Gene set enrichment analysis of RAS signature genes and MAPK signature genes<sup>68</sup> in pHGG vs normal brain. FDR: false-discovery rate. NES: normalised enrichment score.
- C. RAS pathway activation single sample gene set enrichment analysis (ssGSEA) of normal brain (n=5) and IDH-wt (n=243), IDH-mut/non-codel (n=270) and IDH-mut/codel (n=173) adult diffuse glioma. Bars show mean  $\pm$  standard deviation. ES: enrichment score.
- D. Normalised reverse-phase protein array (RPPA) signal for phospho-ERK (ppERK) for IDH-wt (n=100), IDH-mut/non-codel (n=141) and IDH-mut/codel (n=74) adult diffuse glioma. Bars show mean  $\pm$  standard deviation.
- E. Scatter plot of *NF1* exon23a psi and MAPK signature score in pHGG. r: Pearson correlation.
- F. Scatter plot of *NF1* expression and RAS ES in pHGG (enrichment score, determined from ssGSEA). r: Pearson correlation.
- G. Scatter plot of *NF1* expression and MAPK signature score in pHGG. r: Pearson correlation.
- H. Normalised RPPA ppERK signal for adult diffuse glioma that are RAS/MAPK WT or mutant. n: IDH-wt WT=30, mut=102; IDH-mut/non-codel WT=170, mut=36; IDH-mut/codel WT=130, mut=16. Bars show mean  $\pm$  standard deviation.
- I. Kaplan-Meier survival plot comparing Q4 and Q1 patients for all adult diffuse glioma (n: Q1=166, Q4=159).
- J. Kaplan-Meier survival plot comparing Q4 and Q1 patients for IDH-mut/non-codel adult diffuse glioma (n: Q1=68, Q4=66).
- K. Kaplan-Meier survival plot comparing Q4 and Q1 patients for IDH-mut/codel adult diffuse glioma (n: Q1=42, Q4=43).

Statistical tests: Brown-Forsythe ANOVA with Dunnett's T3 multiple comparisons test (C), t (E, F, G, H), Gehan-Breslow-Wilcoxon (I, J, K). NS: not significant. Source data are provided as a Source Data file.

**a**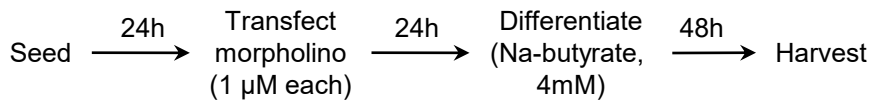**b**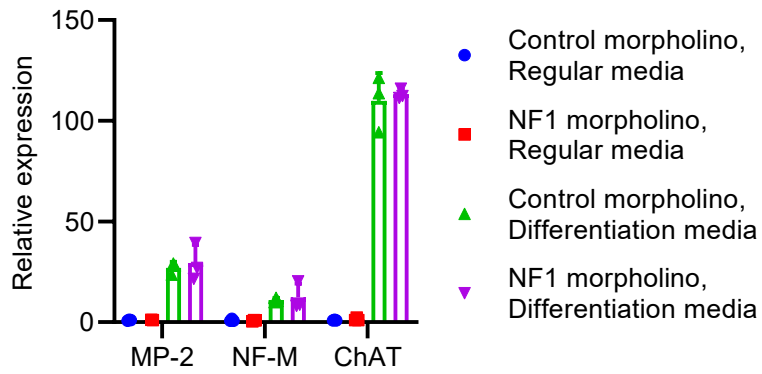**c**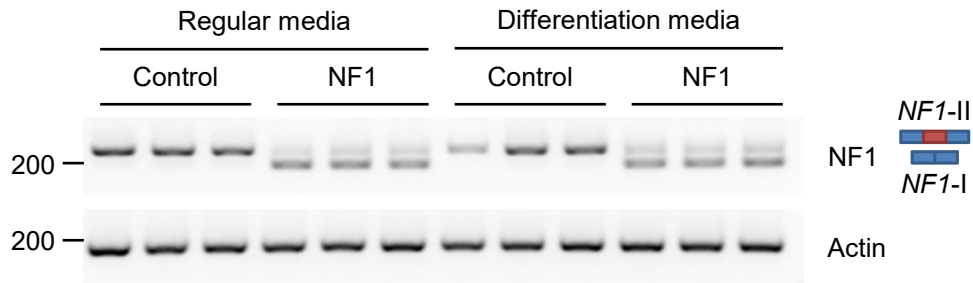



**Supplementary Figure 8. *NF1* exon23a splicing in HGG differentiation**

- A. Schematic of morpholino transfection and differentiation method.
- B. U87 cells were transfected with control or *NF1*-specific morpholinos and differentiated according to A (n=3 independent experiments). Expression of neuronal marker genes was measured by quantitative real-time PCR (qRT-PCR), normalised to *ACTB* levels. Bars show mean  $\pm$  standard deviation.
- C. RT-PCR of *NF1* exon23a inclusion in cells from B. Statistical tests: t (B). Source data are provided as a Source Data file.

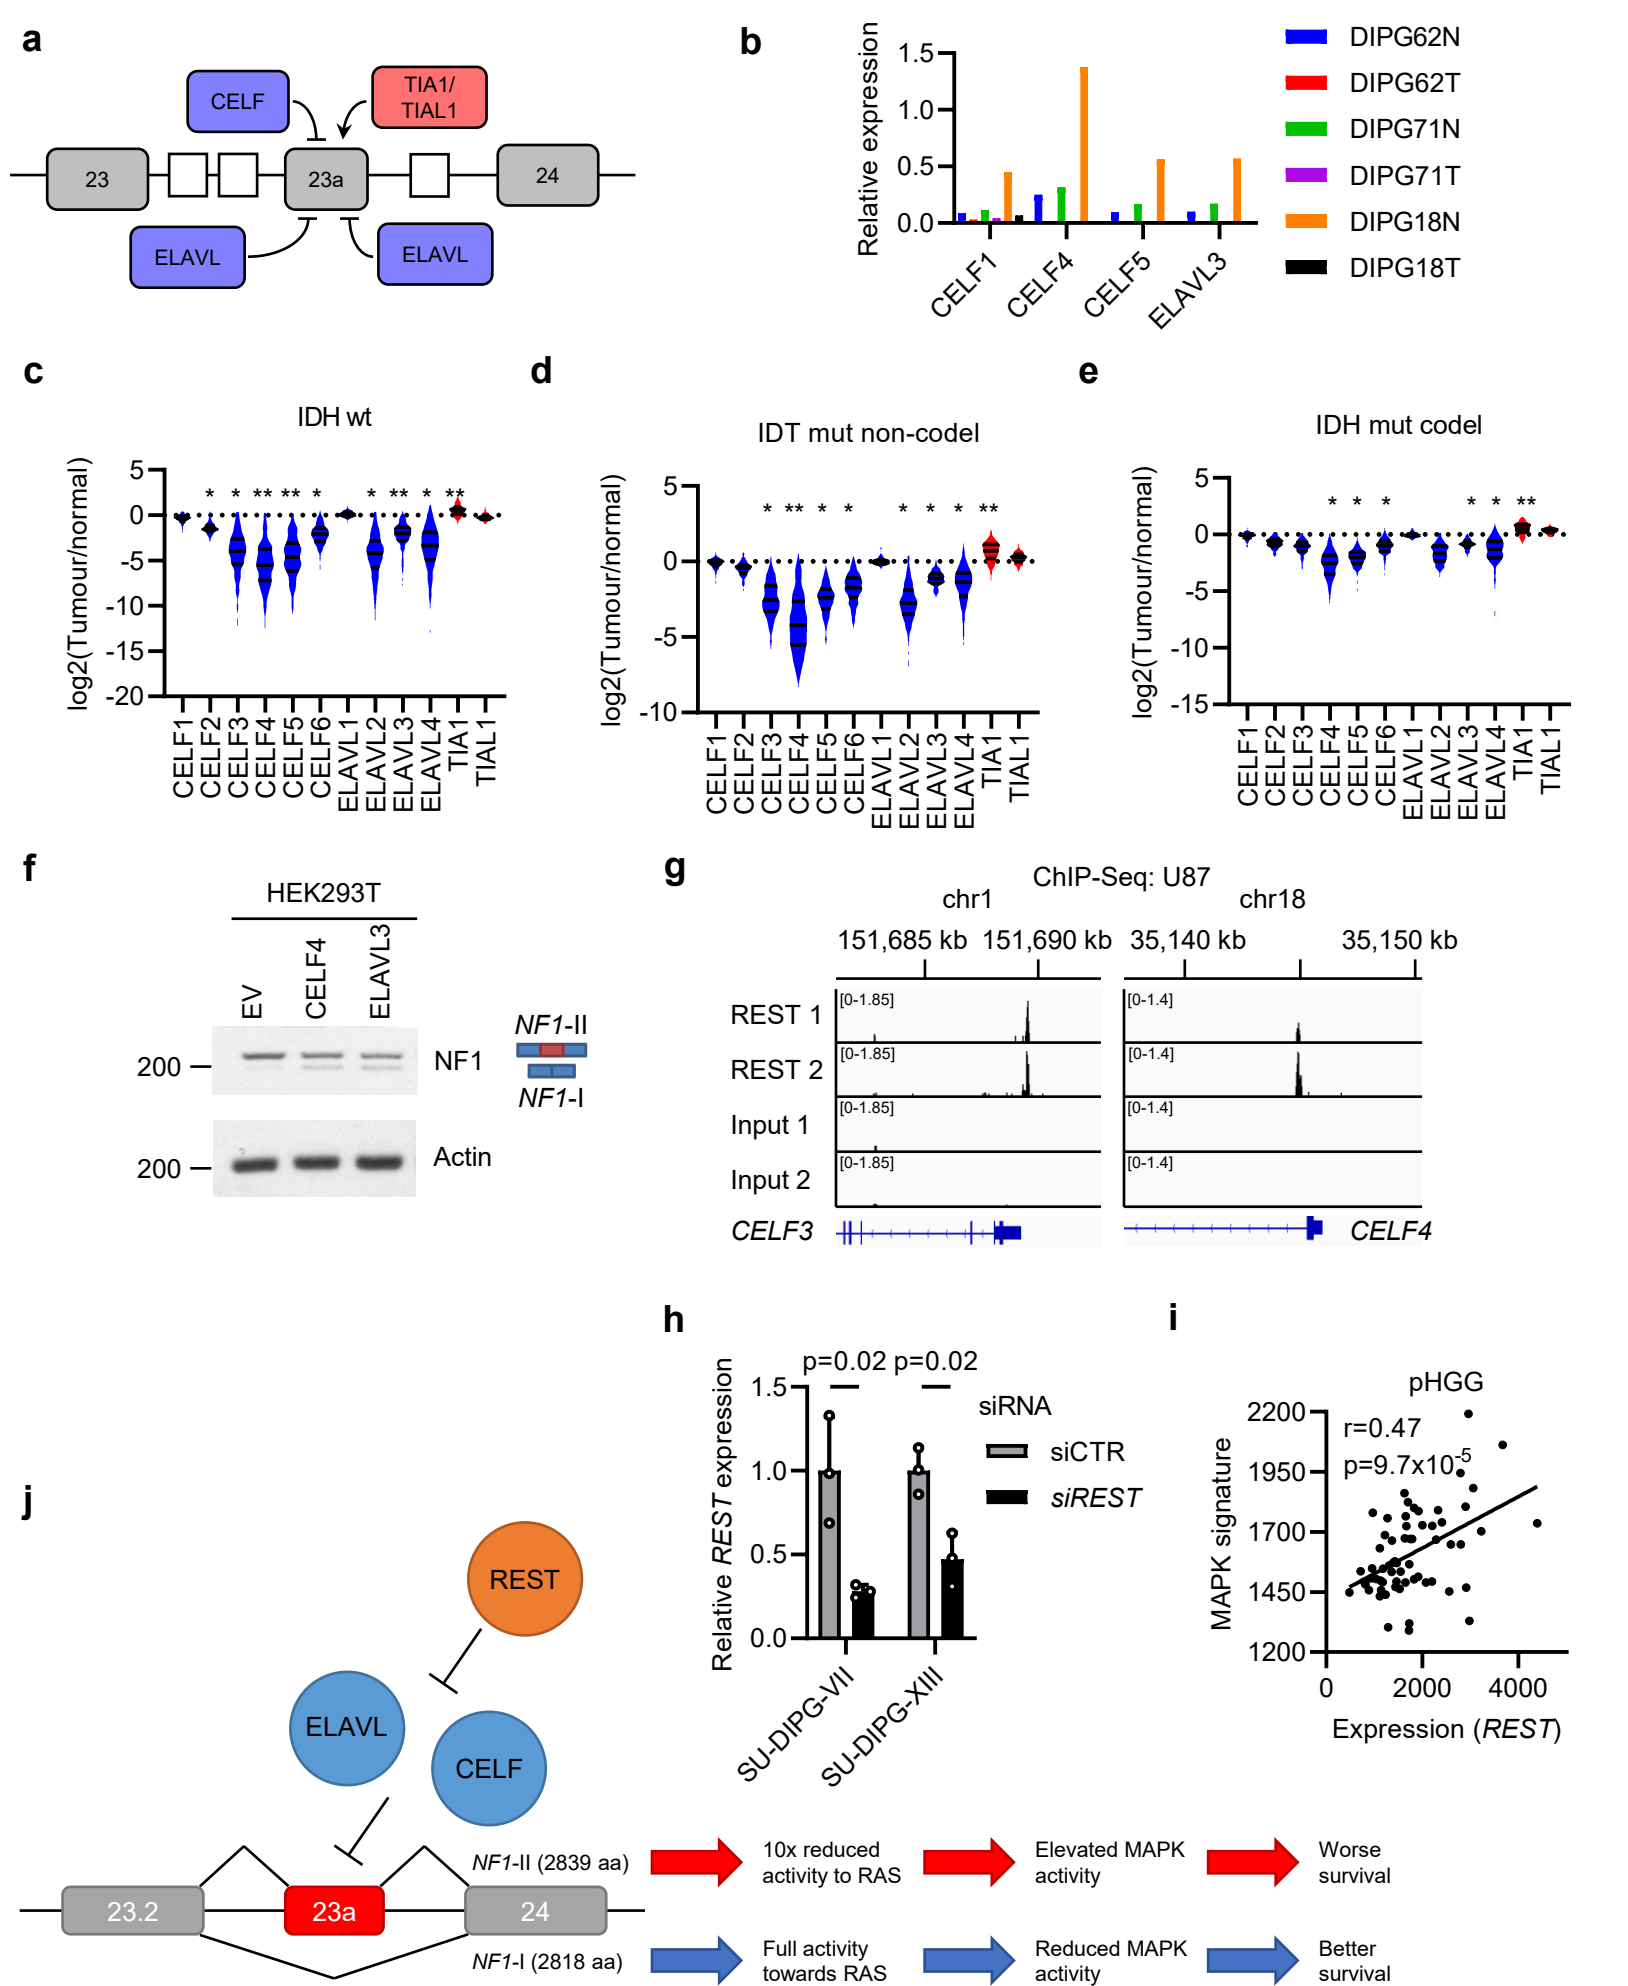

**Supplementary Figure 9. Regulation of *NF1* exon23a splicing in HGG**

- A. Schematic of *NF1* exon23a regulation by negative (blue: CELF, ELAVL) and positive (red: TIA1/TIAL1) families of splice factors, showing relative binding sites of each family (white box).
  - B. qRT-PCR analysis of gene expression in matched pHGG/normal brain, relative to *ACTB* in 3 matched pairs of pHGG and normal brain. Results are presented as the mean of 3 technical replicates.
  - C. Expression ratio (log<sub>2</sub> fold change) of negative (blue) and positive (red) *NF1* exon23a splicing regulators between IDH-wt adult diffuse glioma and normal brain. See Supplementary Data 6 for p-values.
  - D. Expression ratio (log<sub>2</sub> fold change) of negative (blue) and positive (red) *NF1* exon23a splicing regulators between IDH-mut/non-codel adult diffuse glioma and normal brain. See Supplementary Data 6 for p-values.
  - E. Expression ratio (log<sub>2</sub> fold change) of negative (blue) and positive (red) *NF1* exon23a splicing regulators between IDH-mut/codel adult diffuse glioma and normal brain. See Supplementary Data 6 for p-values.
  - F. HEK293T cells transduced with control (EV) lentivirus or expressing CELF4 or ELAVL3 were analysed by RT-PCR. Bands corresponding to *NF1*-II (includes exon23a, red box) and *NF1*-I are shown at the left. Gels are representative of 2 independent experiments.
  - G. Genome browser screenshots from two replicates of REST ChIP-Seq and input control from U87 cells (ENCODE).
  - H. qRT-PCR in SU-DIPG-VII and SU-DIPG-XIII cells transfected with control or *REST*-specific siRNA. Bars show mean ± standard deviation (n=3 experiments) relative to 18S housekeeping, normalised to siCTR expression for each gene.
  - I. Scatter plot of *REST* expression and MAPK activity score in pHGG. r: Pearson correlation.
  - J. Model depicting *NF1* exon23a-mediated modulation of RAS activity in high-grade glioma.
- Statistical tests: t-test (all). \*: p<0.05, \*\*: p<0.01. Source data are provided as a Source Data file.

## Supplementary Tables

**Supplementary Table 1:** Morpholino sequences used in the study.

| Morpholino               | Sequence (5'-3')          |
|--------------------------|---------------------------|
| intron30/exon31(exon23a) | TGCCTACAGAACAGAGATGAGCACA |
| exon31(exon23a)/intron31 | GTTCTCCAAACTTACTGATTTTTTG |
| Non-targeting control    | CCTCTTACCTCAGTTACAATTTATA |

**Supplementary Table 2:** Primer sequences used in the study.

| Oligo                   | Sequence (5'-3')                                        | Use     |
|-------------------------|---------------------------------------------------------|---------|
| pCDH_CELF4 forward      | ACCTCCATAGAAGATTCTAGAGCCAC<br>CATGTATATAAAGATGGCCACGTTA | Cloning |
| pCDH_CELF4 reverse      | GTCGTCCTTGTAGTCGGATCCGTACG<br>GGCGATTGGCGTCTTT          | Cloning |
| pCDH_ELAVL3 forward     | ACCTCCATAGAAGATTCTAGAGCCAC<br>CATGGTCACTCAGATACTGGGGG   | Cloning |
| pCDH_ELAVL3 reverse     | GTCGTCCTTGTAGTCGGATCCCGCCTT<br>GTGCTGTTTGCTGGT          | Cloning |
| NF1_ex23.1 forward      | TGATCACATCCTCTGATTGGCA                                  | RT-PCR  |
| NF1_ex23.2 forward      | CCATGCCATCATCAGTTCCT                                    | qRT-PCR |
| NF1_ex23a reverse       | ATTCAGTAGGGAGTGGCAAGTT                                  | qRT-PCR |
| NF1_ex24 reverse        | GAGGGAAACGCTGGCTAAC                                     | RT-PCR  |
| NF1_ex23.2-ex24 reverse | GCTGGCTAACCACCTGGTATAAA                                 | qRT-PCR |
| ATP2B1 forward          | TCGGCATCAGTGTCAAT                                       | RT-PCR  |
| ATP2B1 reverse          | GTGGCCAAATCTTGTGGTTT                                    | RT-PCR  |
| MADD_26 forward         | AGATGTGAGCCAGCGAGTCT                                    | RT-PCR  |
| MADD_26 reverse         | GGTCCATACCCATCCCTTCT                                    | RT-PCR  |
| MDB1 forward            | AGCCATCTTGGAGTCACAGC                                    | RT-PCR  |
| MBD1 reverse            | CAGACCCAAGAGGATTGTGG                                    | RT-PCR  |
| SMARCC2 forward         | GCCCAAAGTTTTGCATGTCT                                    | RT-PCR  |
| SMARCC2 reverse         | CATGTCTTGGCTGACACACC                                    | RT-PCR  |
| FGFR1 forward           | CATACGGTTTGGTTTGGTGTT                                   | RT-PCR  |
| FGFR1 reverse           | CACACTCTGCACCGCTAGG                                     | RT-PCR  |
| TPD52 forward           | TTTTCGACCTTTTCTTCAAATG                                  | RT-PCR  |
| TPD52 reverse           | TATCCCAGGCTGGACAGAAG                                    | RT-PCR  |
| ERC1 forward            | CTTCAAATCCTCCCATTCCA                                    | RT-PCR  |
| ERC1 reverse            | GGAAGCTGGTGGAGTGAGTC                                    | RT-PCR  |
| ABI2 forward            | CTCCTCCAGTGTCTTTCCA                                     | RT-PCR  |
| ABI2 reverse            | GCAGGCCTATTCATGCTGTA                                    | RT-PCR  |
| MP-2 forward            | AGCAGTCTGAAAGGTGAACA                                    | qRT-PCR |
| MP-2 reverse            | ATCGTGGAACTCCATCTTCG                                    | qRT-PCR |
| NF-M forward            | TCAACGTCAAGATGGCTCTG                                    | qRT-PCR |
| NF-M reverse            | CTTCCACCTTGGGTTTCTGA                                    | qRT-PCR |

|                |                          |                |
|----------------|--------------------------|----------------|
| ChAT forward   | CTGCCCCACCAGTACGTC       | qRT-PCR        |
| ChAT reverse   | CATGGACACGGGTACAGTG      | qRT-PCR        |
| CELF1 forward  | ACCCCATAGCCTCACTTGG      | qRT-PCR        |
| CELF1 reverse  | CCATTTAAAGCAGCCATTCC     | qRT-PCR        |
| CELF3 forward  | AGCTAAAGCGGCCTAAGGAT     | qRT-PCR        |
| CELF3 reverse  | CGTGGGAAGAGGGTGTGA       | qRT-PCR        |
| CELF4 forward  | CCAATCGCCCGTACTGAG       | qRT-PCR        |
| CELF4 reverse  | TTAATGTAGCCCGTTCAGCAT    | qRT-PCR        |
| CELF5 forward  | CTTGCATGGGAGCCAGAC       | qRT-PCR        |
| CELF5 reverse  | GTCGGCGAACTTGACCAC       | qRT-PCR        |
| ELAVL3 forward | ACGGCCTCAAATTACAGACG     | qRT-PCR        |
| ELAVL3 reverse | CGCTGACGTACAGGTTAGCAT    | qRT-PCR        |
| ACTB forward   | TCCCTGGAGAAGAGCTACGA     | RT-PCR/qRT-PCR |
| ACTB reverse   | AGCACTGTGTTGGCGTACAG     | RT-PCR/qRT-PCR |
| 18S forward    | CGGCGACGACCCATTCGAAC     | qRT-PCR        |
| 18S reverse    | GAATCGAACCCCTGATTCCCCGTC | qRT-PCR        |
| CELF3 forward  | GAGCCACGCCCTCTTTCTAT     | ChIP           |
| CELF3 reverse  | ACCCCACTTTAGGGTTCCTCT    | ChIP           |
| CELF4 forward  | GTATTTTCAGCACCACGGCG     | ChIP           |
| CELF4 reverse  | ACAGCGACCTGAAAGATGGG     | ChIP           |
| ELAVL3 forward | CATGCTCGCTCTCTGCTAGG     | ChIP           |
| ELAVL3 reverse | CCAGTGTGTGCTAGTTCCCG     | ChIP           |
