# Supplementary material for: Splicing is an alternate oncogenic pathway activation mechanism in glioma
Source: PubMed Central journal article supplement (PMC8803922; doi:10.1038/s41467-022-28253-4), 2022-01-31
Supplement: 41467_2022_28253_MOESM2_ESM.pdf [file 41467_2022_28253_MOESM2_ESM.pdf]

### **Description of Additional Supplementary Files**

File Name: Supplementary Data 1

Description: Patient cohort

File Name: Supplementary Data 2

Description: Core RAS/MAPK genes, spliceosome genes, spliceosome alterations

File Name: Supplementary Data 3

Description: Differential ASE in pHGG vs normal brain

File Name: Supplementary Data 4

Description: sample numbers and p-values for Figure 2f, Supplementary Figures 3e, 9c-e
